# Supplementary material for: Associations of longitudinal plasma p-tau181 and NfL with tau-PET, Aβ-PET and cognition
Source: PubMed Central journal article supplement — J Neurol Neurosurg Psychiatry. 2021 Jun 29;92(12):1289–95. doi: 10.1136/jnnp-2020-325537 (PMC8606440; doi:10.1136/jnnp-2020-325537), 2021-06-29

## Supplement

**eTable 1.** Baseline associations between cognitive performance and plasma p-tau 181 and NfL concentration. Analyses adjusted for age and sex.

| Variable                                    | A-TN- (N=260) |       | A+TN- (N=173) |      | A+TN+ (N=300) |                        | A-TN+ (N=132) |      |
|---------------------------------------------|---------------|-------|---------------|------|---------------|------------------------|---------------|------|
|                                             | B (s.B)       | p     | B (s.B)       | p    | B (s.B)       | p                      | B (s.B)       | p    |
| ADNI-mem                                    |               |       |               |      |               |                        |               |      |
| Plasma p-tau 181 log <sub>10</sub> baseline | -0.22 (-0.09) | 0.13  | -0.56 (-0.16) | 0.03 | -1.14 (-0.24) | 2.84x10 <sup>-05</sup> | -0.19 (-0.08) | 0.36 |
| Plasma NfL log <sub>10</sub> baseline       | -0.79 (-0.23) | 0.002 | -0.74 (-0.18) | 0.03 | -1.27 (-0.25) | 6.84x10 <sup>-05</sup> | -0.60 (-0.17) | 0.08 |

Abbreviations: A+/-, Amyloid- $\beta$  positive/negative; TN+/-, Tau/Neurodegeneration positive/negative; B, beta (slope); s.B, standardized beta; p-tau 181, plasma phosphorylated tau 181; NfL, neurofilament light protein.

**eTable 2.** Prediction of ADNI-mem, tau (florbetapir) and A $\beta$  (florbetapir) PET meta ROI SUVR tracer uptake for plasma p-tau 181 and plasma NfL baseline concentrations and rates of change over time (slope). Analyses adjusted for age, sex and the time difference between baseline and ADNI-mem assessment/ PET scan and CDR global score. Baseline cognition was included in the model when predicting ADNI-mem at follow-up.

| Variable                                   | Entire cohort (N=503) |        | A-TN- (N=192)  |        | A+TN- (N=101) |       | A+TN+ (N=121)  |        | A-TN+ (N=89)  |        |
|--------------------------------------------|-----------------------|--------|----------------|--------|---------------|-------|----------------|--------|---------------|--------|
|                                            | B (s.B)               | p      | B (s.B)        | p      | B (s.B)       | p     | B (s.B)        | p      | B (s.B)       | p      |
| <b>ADNI-mem</b>                            |                       |        |                |        |               |       |                |        |               |        |
| Plasma p-tau181 log <sub>10</sub> baseline | -0.64 (-0.16)         | <0.001 | -0.11 (-0.04)  | 0.4    | -0.29 (-0.07) | 0.29  | -1.57 (-0.25)  | <0.001 | -0.45 (-0.13) | 0.10   |
| Plasma NfL log <sub>10</sub> baseline      | -0.88 (-0.16)         | <0.001 | -0.39 (-0.09)  | 0.08   | -0.20 (-0.04) | 0.60  | -1.04 (-0.16)  | 0.04   | -1.33 (-0.28) | <0.001 |
| Plasma p-tau181 slope                      | -2.86 (-0.03)         | 0.32   | -3.89 (-0.06)  | 0.18   | -5.20 (-0.05) | 0.42  | -1.54 (0.01)   | 0.86   | -3.31 (-0.04) | 0.63   |
| Plasma NfL slope                           | -12.95 (-0.11)        | <0.001 | -10.55 (-0.12) | <0.001 | -8.18 (-0.08) | 0.245 | -23.48 (-0.20) | <0.001 | 0.99 (0.01)   | 0.90   |
| <b>Tau PET</b>                             |                       |        |                |        |               |       |                |        |               |        |
| Plasma p-tau181 log <sub>10</sub> baseline | 0.62 (0.26)           | <0.001 | 0.04 (0.07)    | 0.54   | 0.08 (0.05)   | 0.79  | 1.99 (0.31)    | 0.06   | 0.17 (0.10)   | 0.62   |
| Plasma NfL log <sub>10</sub> baseline      | 0.54 (0.15)           | 0.05   | 0.05 (0.05)    | 0.73   | -0.22 (-0.10) | 0.56  | 1.61 (0.24)    | 0.16   | 0.17 (0.07)   | 0.73   |
| Plasma p-tau181 slope                      | 5.35 (0.08)           | 0.26   | 0.21 (0.01)    | 0.90   | 9.88 (0.21)   | 0.18  | 13.93 (0.09)   | 0.59   | 13.11 (0.22)  | 0.26   |
| Plasma NfL slope                           | 22.07(0.26)           | <0.001 | 0.70 (0.03)    | 0.80   | 10.51 (0.25)  | 0.13  | 69.70 (0.45)   | <0.001 | 17.81 (0.28)  | 0.12   |
| <b>Amyloid PET</b>                         |                       |        |                |        |               |       |                |        |               |        |
| Plasma p-tau181 log <sub>10</sub> baseline | 0.70 (0.24)           | 0.01   | -0.03 (-0.03)  | 0.87   | 0.76 (0.18)   | 0.55  | 0.66 (0.25)    | 0.36   | 0.11 (0.05)   | 0.83   |
| Plasma NfL log <sub>10</sub> baseline      | 0.90 (0.19)           | 0.08   | 0.28 (0.13)    | 0.49   | 0.45 (0.06)   | 0.85  | 0.01 (0.003)   | 0.99   | 0.24 (0.09)   | 0.79   |
| Plasma p-tau181 slope                      | 5.92 (0.07)           | 0.49   | 4.52 (0.13)    | 0.42   | 58.47 (0.36)  | 0.13  | -13.71 (-0.14) | 0.64   | -9.40 (-0.18) | 0.55   |
| Plasma NfL slope                           | 13.93 (0.13)          | 0.18   | 8.78 (0.17)    | 0.24   | 11.82 (0.09)  | 0.71  | -23.98 (-0.32) | 0.24   | 23.57 (0.38)  | 0.09   |

**eFigure 1.** Baseline group differences for A) plasma p-tau 181 and B) plasma NfL concentrations (all comparisons significant ( $p < 0.001$ ) except A+TN- vs A-TN+) and associations at baseline between cognitive performance (ADNI-mem) and C)  $\log_{10}$  plasma p-tau 181 and D)  $\log_{10}$  plasma NfL concentrations in the different ATN groups. Abbreviations: A+/-, Amyloid- $\beta$  positive/negative; TN+/-, Tau/Neurodegeneration; P-tau 181, Tau phosphorylated at threonine 181; Nfl, Neurofilament light chain; pg/ml, picogram per milliliter; bl, baseline.

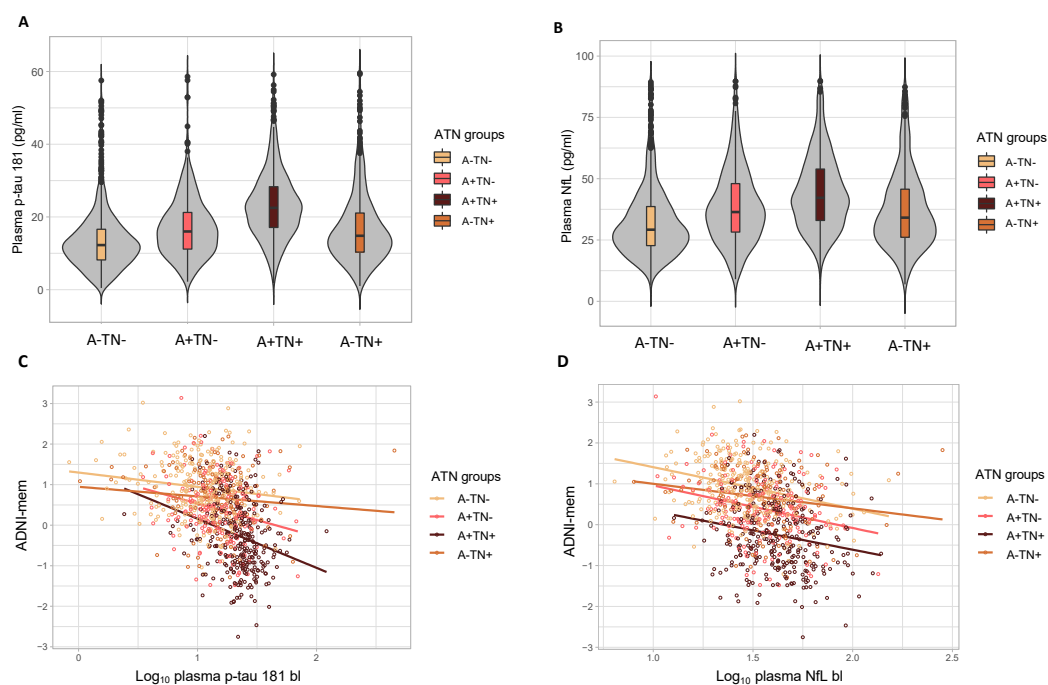

Supplement: jnnp-2020-325537supp001.pdf [file jnnp-2020-325537supp001.pdf]
